# Supplementary material
Source: PubMed Central journal article supplement (PMC4530345)
Supplement: DS_10.1177_0022034515588281.pdf [file DS_10.1177_0022034515588281.pdf]

# Spectrum of Dental Phenotypes in Nonsyndromic Orofacial Clefting

Journal of Dental Research  
DSI-DS6  
© International & American Associations  
for Dental Research 2015  
Reprints and permissions:  
sagepub.com/journalsPermissions.nav  
DOI: 10.1177/0022034515588281  
jdr.sagepub.com

B.J. Howe<sup>1\*</sup>, M.E. Cooper<sup>2</sup>, A.R. Vieira<sup>2,3</sup>, S.M. Weinberg<sup>2</sup>,  
J.M. Resick<sup>2</sup>, N.L. Nidey<sup>4</sup>, G.L. Wehby<sup>5</sup>, M.L. Marazita<sup>2,3</sup>,  
and L.M. Moreno Uribe<sup>6,7\*</sup>

## Appendix

### Rules to Evaluation Agenesis

#### Maxillary Lateral Incisor (LI):

- If the subject is an adult with permanent canines erupted and the lateral incisor (LI) is not erupted: Mark Agenesis
  - Unless subject has multiple teeth with gross decay and/or multiple missing teeth likely due to extractions
- If the subject is an adult with poor dentition (gross decay): mark Other, make note in
- quadrant notes section = Not Present.
- If the permanent canine is erupted or ectopically erupted into LI space, and LI is not present: mark Agenesis
- If obvious cleft and LI not present:
  - If 1st permanent molar(s) erupted: mark Agenesis with low confidence
  - If permanent canines erupted: mark Agenesis with high confidence

#### Maxillary Central Incisor (CI):

- If obvious cleft and the central incisor (CI) not present:
  - If 1<sup>st</sup> permanent molar(s) is/are erupted: mark Agenesis with low confidence.
  - If permanent canines are erupted: mark Agenesis with high confidence.

#### Second Premolar:

- If the second permanent molar is erupted, have minimal restorations, no gross decay, no history of tooth extraction given: mark Agenesis with low confidence
  - Unless subject has a history of orthodontics: mark Other, make note in quadrant notes section: mark Not Present
- If the second permanent molar is erupted and the subject has multiple teeth with gross decay and 2<sup>nd</sup> premolar not present: mark Not Present

### Rules for “Other”

- If permanent tooth is erupting and remnants of primary tooth are still present: mark the permanent tooth as present.

- If tooth is blurry or unable to clearly see the outline of the tooth: mark Other, make a note in quadrant notes section: Not Visible
- If teeth are not visible in photo: mark Other, make a note quadrant notes section: Not Visible
- If unable to determine the position of the tooth: mark Other, make a note in quadrant notes section: Not Visible, Unable to tell position
- If root tips are present and unable to tell position of the tooth: mark Other, make a note in quadrant notes section: Unable to tell position, root tips
- If primary teeth are present and permanent first molar and posterior have not erupted: mark Other, make a note in quadrant notes section: Not Visible
- If primary teeth present and permanent first molar erupted, but second permanent molar not erupted: mark Other, make a note quadrant notes section: Not Visible
- If permanent second molar is erupted and permanent canine not erupted: mark Other, make a note in quadrant notes section: Not Present, impacted
- If 3<sup>rd</sup> molars are not present, with no history of 3<sup>rd</sup> molar extractions: mark Other, make a note in quadrant notes section: Not Visible

<sup>1</sup>Department of Family Dentistry, College of Dentistry, University of Iowa, Iowa City, IA, USA

<sup>2</sup>Center for Craniofacial and Dental Genetics School of Dental Medicine, University of Pittsburgh, Pittsburgh, PA, USA

<sup>3</sup>Department of Oral Biology, School of Dental Medicine, University of Pittsburgh, Pittsburgh, PA, USA

<sup>4</sup>Department of Pediatrics, College of Medicine, University of Iowa, Iowa City, IA, USA

<sup>5</sup>Department of Health Management and Policy, College of Public Health, University of Iowa, Iowa City, IA, USA

<sup>6</sup>Department of Orthodontics, College of Dentistry, University of Iowa, Iowa City, IA, USA

<sup>7</sup>Dows Institute for Dental Research, College of Dentistry, University of Iowa, Iowa City, IA, USA

\*Authors contributing equally to this article.

#### Corresponding Author:

L.M. Moreno Uribe, Dows Institute-Research, N401 Dental Science Building, University of Iowa, Iowa City, IA 52242, USA.  
Email: lina-moreno@uiowa.edu

**Appendix Table 1.** Study Population (1,745 Males, 2,096 Females, 2 Unknown Sex).

| Country              | Site       | Proband Case   | Sibling Unaffected | Parent Unaffected | Proband Control | Sibling Control | Parent Control | Total | Rating         |
|----------------------|------------|----------------|--------------------|-------------------|-----------------|-----------------|----------------|-------|----------------|
| United States        | Colorado   | 16             | 21                 | 27                | 0               | 0               | 0              | 64    | Exam           |
|                      | Pittsburgh | 38             | 39                 | 57                | 85              | 5               | 10             | 234   | Exam and photo |
|                      | Iowa       | 111            | 106                | 169               | 149             | 37              | 71             | 643   | Photo          |
|                      | Texas      | 83             | 133                | 142               | 0               | 0               | 0              | 358   | Exam and photo |
| Guatemala            |            | 45             | 32                 | 87                | 177             | 23              | 80             | 444   | Exam           |
| Argentina            |            | 117            | 64                 | 155               | 33              | 5               | 11             | 385   | Exam           |
| Hungary              |            | 102            | 94                 | 190               | 187             | 82              | 175            | 830   | Photo          |
| Nigeria <sup>a</sup> |            | 1 <sup>a</sup> | 0                  | 3                 | 1 <sup>a</sup>  | 0               | 0              | 5     | Exam           |
| Philippines          |            | 147            | 247                | 356               | 98              | 0               | 0              | 848   | Photo          |
| Total                |            | 660            | 736                | 1186              | 730             | 152             | 347            | 3811  |                |
| Male sex             |            | 398            | 332                | 494               | 332             | 75              | 115            | 1745  |                |
| Female sex           |            | 261            | 404                | 692               | 397             | 77              | 232            | 2063  |                |
| Age, mean (range), y |            | 9.8 (<1–74)    | 12.0 (<1–52)       | 37.8 (15–73)      | 25.9 (<1–74)    | 12.3 (1–55)     | 37.4 (19–79)   |       |                |

<sup>a</sup>Sex of probands in Nigeria unknown.

**Appendix Table 2.** Definition of Dental Anomalies.

| Dental Anomaly | Definition                                                                                                                                                                                                                                                                                                                                                                                      |
|----------------|-------------------------------------------------------------------------------------------------------------------------------------------------------------------------------------------------------------------------------------------------------------------------------------------------------------------------------------------------------------------------------------------------|
| Hypoplasia     | A defect involving the surface of the enamel associated with a reduced thickness of enamel. It can occur in the forms of pits, grooves, or large areas of missing enamel.                                                                                                                                                                                                                       |
| Microdontia    | Any tooth in which the incisal mesiodistal width appears narrower than the cervical width (i.e., cone shape, peg shape) or that appears much smaller than its regular size compared with its contralateral homolog or that appears out of proportion compared with other teeth of the same group (i.e., incisors, canines, premolars, molars).                                                  |
| Impacted       | A tooth that fails to erupt into the dental arch, regardless of adequate space. The determination of impactions was used only for canines that were still not erupted even though permanent second molars were fully erupted.                                                                                                                                                                   |
| Rotated        | Any turn of the long axis of a tooth either mesially or distally in relation to the line of occlusion.                                                                                                                                                                                                                                                                                          |
| Displaced      | Any tilt of the long axis of the tooth either buccally or lingually from the normal anatomical position in the dental arch or in a way that it appears outside of the line of occlusion.                                                                                                                                                                                                        |
| Agenesis       | The failure of any tooth to develop during embryonic growth and development due to the absence of primordial tissue. Agenesis was determined based on the age of the subjects. For instance, agenesis of the permanent lateral was determined only after the eruption of the permanent canines. Agenesis of second premolars was determined only after eruption of the second permanent molars. |
| Supernumerary  | Any tooth that appears in addition to the regular number of teeth. Only erupted supernumeraries were counted in this study.                                                                                                                                                                                                                                                                     |
| Any anomaly    | Counts of at least one occurrence of any of the anomalies evaluated in this study.                                                                                                                                                                                                                                                                                                              |
| Any anomaly    | Counts of at least one occurrence of any of the anomalies evaluated in this study except for dental malposition (rotated or displaced teeth).                                                                                                                                                                                                                                                   |

The second and third permanent molars were excluded from the study.

**Appendix Table 3.** Recording of Anomalies in Primary Dentition (Maxilla, Mandible).

| Country       | Site       | Hypoplasia | Microdontia | Impacted | Rotated  | Displaced | Agenesis | Supernumerary |
|---------------|------------|------------|-------------|----------|----------|-----------|----------|---------------|
| United States | Colorado   | 5, 2       | 0, 0        | 0, 0     | 7, 0     | 6, 0      | 0, 0     | 5, 0          |
|               | Pittsburgh | 4, 10      | 4, 3        | 0, 2     | 18, 17   | 8, 0      | 6, 0     | 1, 0          |
|               | Iowa       | 7, 1       | 2, 0        | 0, 0     | 137, 152 | 53, 7     | 8, 0     | 8, 1          |
|               | Texas      | 12, 4      | 4, 4        | 0, 0     | 84, 94   | 31, 6     | 26, 0    | 2, 0          |
| Guatemala     |            | 0, 0       | 0, 0        | 0, 0     | 0, 0     | 0, 0      | 4, 0     | 0, 1          |
| Argentina     |            | 14, 7      | 0, 1        | 0, 0     | 1, 0     | 1, 0      | 11, 0    | 2, 0          |
| Hungary       |            | 23, 1      | 3, 1        | 0, 2     | 112, 133 | 36, 12    | 5, 1     | 4, 0          |
| Nigeria       |            | 0, 0       | 0, 0        | 0, 0     | 0, 0     | 0, 0      | 0, 0     | 0, 0          |
| Philippines   |            | 16, 13     | 1, 1        | 0, 0     | 69, 96   | 51, 19    | 13, 0    | 5, 3          |
| Total         |            | 81, 38     | 14, 10      | 0, 4     | 428, 492 | 186, 44   | 73, 1    | 27, 5         |

**Appendix Table 4.** Recording of Anomalies in Permanent Dentition (Maxilla, Mandible).

| Country       | Site       | Hypoplasia | Microdontia | Impacted | Rotated      | Displaced    | Agensis | Supernumerary |
|---------------|------------|------------|-------------|----------|--------------|--------------|---------|---------------|
| United States | Colorado   | 22, 13     | 3, 0        | 0, 0     | 0, 6         | 4, 3         | 0, 0    | 1, 0          |
|               | Pittsburgh | 59, 26     | 0, 0        | 1, 2     | 55, 71       | 21, 37       | 9, 7    | 1, 0          |
|               | Iowa       | 14, 18     | 5, 0        | 13, 4    | 1,095, 1,706 | 345, 283     | 59, 3   | 0, 1          |
|               | Texas      | 35, 19     | 36, 2       | 14, 7    | 712, 1,007   | 183, 159     | 77, 14  | 2, 3          |
| Guatemala     |            | 0, 0       | 4, 0        | 6, 1     | 6, 10        | 7, 20        | 12, 9   | 1, 0          |
| Argentina     |            | 62, 15     | 11, 0       | 3, 0     | 6, 7         | 15, 3        | 68, 12  | 5, 0          |
| Hungary       |            | 38, 14     | 13, 0       | 15, 5    | 1,518, 2,071 | 383, 387     | 61, 15  | 4, 0          |
| Nigeria       |            | 0, 0       | 0, 0        | 0, 0     | 0, 0         | 0, 0         | 0, 0    | 0, 0          |
| Philippines   |            | 129, 58    | 65, 3       | 16, 3    | 1,603, 2,584 | 496, 632     | 105, 23 | 18, 3         |
| Total         |            | 359, 163   | 137, 5      | 68, 22   | 4,995, 7,462 | 1,454, 1,524 | 391, 83 | 32, 7         |

**Appendix Table 5.** Case Probands: Primary Dentition, Cleft Type, and Laterality.

|                          | Cleft Type, n (%) |                    |                  |                    | Laterality of Cleft (CL or CLP), n (%) |                      |                      |                    |
|--------------------------|-------------------|--------------------|------------------|--------------------|----------------------------------------|----------------------|----------------------|--------------------|
|                          | CL (n = 78, 17%)  | CLP (n = 303, 65%) | CP (n = 85, 18%) | P Value            | Left Cleft (n = 172)                   | Right Cleft (n = 85) | Both Sides (n = 107) | P Value            |
| <b>Right maxilla</b>     |                   |                    |                  |                    |                                        |                      |                      |                    |
| Hypoplasia               | 2 (3)             | 13 (4)             | 1 (1)            | 0.42               | 5 (3)                                  | 6 (7)                | 4 (4)                | 0.28               |
| Microdontia              | 1 (1)             | 4 (1)              | 0                | 0.67               | 1 (<1)                                 | 2 (1)                | 2 (2)                | 0.44               |
| Impacted                 | 0                 | 0                  | 0                | NA                 | 0                                      | 0                    | 0                    | NA                 |
| Rotated                  | 16 (21)           | 63 (21)            | 17 (20)          | 1.00               | 31 (18)                                | 25 (29)              | 21 (20)              | 0.11               |
| Displaced                | 7 (9)             | 42 (14)            | 3 (4)            | 0.01               | 13 (8)                                 | 20 (24)              | 15 (14)              | 0.002              |
| Agensis                  | 1 (1)             | 22 (7)             | 0                | 0.002              | 2 (1)                                  | 8 (9)                | 13 (12)              | 1E-04 <sup>a</sup> |
| Supernumerary            | 8 (10)            | 5 (2)              | 0                | 5E-04              | 6 (3)                                  | 1 (1)                | 5 (5)                | 0.41               |
| Any anomaly              | 26 (32)           | 101 (33)           | 19 (22)          | 0.15               | 47 (27)                                | 35 (41)              | 41 (38)              | 0.04               |
| Any anomaly <sup>b</sup> | 11 (14)           | 41 (14)            | 1 (1)            | 8E-04              | 13 (8)                                 | 17 (20)              | 21 (20)              | 0.003              |
| <b>Left maxilla</b>      |                   |                    |                  |                    |                                        |                      |                      |                    |
| Hypoplasia               | 1 (1)             | 13 (4)             | 2 (2)            | 0.45               | 9 (5)                                  | 2 (1)                | 3 (2)                | 0.50               |
| Microdontia              | 3 (4)             | 4 (1)              | 1 (1)            | 0.27               | 2 (1)                                  | 1 (1)                | 4 (4)                | 0.29               |
| Impacted                 | 0                 | 0                  | 0                | NA                 | 0                                      | 0                    | 0                    | NA                 |
| Rotated                  | 22 (28)           | 70 (23)            | 15 (18)          | 0.27               | 45 (26)                                | 19 (22)              | 26 (24)              | 0.81               |
| Displaced                | 3 (4)             | 59 (19)            | 5 (6)            | 4E-05 <sup>a</sup> | 26 (5)                                 | 9 (11)               | 26 (43)              | 0.03               |
| Agensis                  | 2 (3)             | 37 (12)            | 0                | 3E-05 <sup>a</sup> | 25 (5)                                 | 2 (2)                | 11 (10)              | 0.006              |
| Supernumerary            | 6 (8)             | 7 (2)              | 0                | 0.01               | 1 (<1)                                 | 8 (9)                | 3 (3)                | 9E-04              |
| Any anomaly              | 27 (35)           | 117 (39)           | 19 (22)          | 0.02               | 70 (40)                                | 28 (33)              | 43 (40)              | 0.47               |
| Any anomaly <sup>b</sup> | 11 (14)           | 52 (17)            | 3 (4)            | 0.002              | 30 (17)                                | 12 (14)              | 19 (18)              | 0.76               |
| <b>Maxilla</b>           |                   |                    |                  |                    |                                        |                      |                      |                    |
| Hypoplasia               | 2 (2)             | 20 (7)             | 2 (2)            | 0.20               | 11 (6)                                 | 6 (7)                | 5 (5)                | 0.75               |
| Microdontia              | 3 (4)             | 6 (2)              | 1 (1)            | 0.56               | 3 (2)                                  | 2 (2)                | 4 (4)                | 0.51               |
| Impacted                 | 0                 | 0                  | 0                | NA                 | 0                                      | 0                    | 0                    | NA                 |
| Rotated                  | 26 (33)           | 96 (32)            | 20 (23)          | 0.30               | 55 (32)                                | 30 (35)              | 33 (31)              | 0.79               |
| Displaced                | 10 (13)           | 81 (27)            | 6 (7)            | 3E-05 <sup>a</sup> | 35 (20)                                | 23 (27)              | 31 (29)              | 0.21               |
| Agensis                  | 3 (4)             | 52 (17)            | 0                | 1E-07 <sup>a</sup> | 27 (16)                                | 9 (11)               | 18 (17)              | 0.47               |
| Supernumerary            | 13 (17)           | 12 (4)             | 0                | 1E-05 <sup>a</sup> | 7 (4)                                  | 8 (9)                | 8 (7)                | 0.20               |
| Any anomaly              | 35 (45)           | 151 (50)           | 23 (27)          | 8E-04 <sup>a</sup> | 86 (50)                                | 43 (51)              | 52 (48)              | 0.97               |
| Any anomaly <sup>b</sup> | 17 (22)           | 76 (25)            | 3 (2)            | 7E-06 <sup>a</sup> | 39 (23)                                | 23 (27)              | 27 (26)              | 0.68               |
| <b>Mandible</b>          |                   |                    |                  |                    |                                        |                      |                      |                    |
| Hypoplasia               | 0                 | 4 (1)              | 0                | 0.61               | 2 (1)                                  | 0                    | 2 (2)                | 0.69               |
| Microdontia              | 0                 | 2 (<1)             | 1 (1)            | 0.73               | 1 (<1)                                 | 0                    | 1 (<1)               | 1.00               |
| Impacted                 | 0                 | 3 (<1)             | 0                | 1.00               | 1 (<1)                                 | 0                    | 1 (<1)               | 1.00               |
| Rotated                  | 15 (19)           | 68 (22)            | 25 (29)          | 0.27               | 37 (22)                                | 21 (25)              | 22 (21)              | 0.77               |
| Displaced                | 1 (1)             | 10 (3)             | 3 (4)            | 0.73               | 6 (3)                                  | 3 (4)                | 2 (2)                | 0.79               |
| Agensis                  | 0                 | 1 (<1)             | 0                | 1.00               | 0                                      | 0                    | 1 (<1)               | 0.53               |
| Supernumerary            | 0                 | 2 (<1)             | 1 (1)            | 0.73               | 1 (<1)                                 | 0                    | 0                    | 1.00               |
| Any anomaly              | 16 (20)           | 78 (26)            | 26 (31)          | 0.33               | 31 (18)                                | 17 (20)              | 20 (19)              | 0.91               |
| Any anomaly <sup>b</sup> | 0                 | 12 (4)             | 2 (2)            | 0.22               | 5 (3)                                  | 0                    | 6 (6)                | 0.08               |

CL, cleft lip; CLP, cleft lip and palate; CP, cleft palate; NA, not applicable.

<sup>a</sup>Indicates significance ( $P < 1.5E-04$ ).<sup>b</sup>Any anomaly without malposition (displacement and rotation).

**Appendix Table 6.** Case Probands: Permanent Dentition, Cleft Type, and Laterality.

|                          | Cleft Type, n (%) |                    |                  | P Value            | Laterality of Cleft (CL or CLP), n (%) |                       |                      | P Value            |
|--------------------------|-------------------|--------------------|------------------|--------------------|----------------------------------------|-----------------------|----------------------|--------------------|
|                          | CL (n = 95, 19%)  | CLP (n = 336, 68%) | CP (n = 66, 13%) |                    | Left Cleft (n = 178)                   | Right Cleft (n = 100) | Both Sides (n = 125) |                    |
| <b>Right maxilla</b>     |                   |                    |                  |                    |                                        |                       |                      |                    |
| Hypoplasia               | 2 (2)             | 32 (10)            | 0                | 0.004              | 6 (4)                                  | 11 (11)               | 16 (13)              | 0.004              |
| Microdontia              | 4 (4)             | 18 (5)             | 1 (2)            | 0.52               | 3 (2)                                  | 9 (9)                 | 8 (6)                | 0.01               |
| Impacted                 | 0                 | 15 (4)             | 1 (2)            | 0.06               | 4 (2)                                  | 5 (5)                 | 4 (3)                | 0.42               |
| Rotated                  | 51 (54)           | 151 (45)           | 27 (41)          | 0.21               | 78 (44)                                | 48 (48)               | 54 (43)              | 0.76               |
| Displaced                | 20 (21)           | 107 (32)           | 18 (27)          | 0.12               | 42 (23)                                | 38 (38)               | 33 (26)              | 0.04               |
| Agenesis                 | 11 (12)           | 101 (30)           | 0                | 5E-11 <sup>a</sup> | 30 (17)                                | 35 (35)               | 39 (31)              | 9E-04              |
| Supernumerary            | 5 (5)             | 4 (1)              | 0                | 0.03               | 8 (4)                                  | 0                     | 0                    | 0.005              |
| Any anomaly              | 58 (61)           | 218 (65)           | 32 (48)          | 0.04               | 105 (59)                               | 67 (67)               | 80 (64)              | 0.38               |
| Any anomaly <sup>b</sup> | 20 (21)           | 142 (42)           | 2 (3)            | 1E-12 <sup>a</sup> | 46 (26)                                | 50 (50)               | 55 (44)              | 6E-05 <sup>a</sup> |
| <b>Left maxilla</b>      |                   |                    |                  |                    |                                        |                       |                      |                    |
| Hypoplasia               | 6 (6)             | 36 (11)            | 1 (2)            | 0.03               | 21 (12)                                | 4 (4)                 | 16 (13)              | 0.05               |
| Microdontia              | 10 (11)           | 24 (7)             | 2 (3)            | 0.20               | 16 (9)                                 | 3 (3)                 | 10 (8)               | 0.16               |
| Impacted                 | 1 (1)             | 15 (4)             | 1 (2)            | 0.25               | 7 (4)                                  | 1 (1)                 | 3 (2)                | 0.36               |
| Rotated                  | 57 (60)           | 158 (47)           | 29 (44)          | 0.06               | 93 (52)                                | 50 (50)               | 51 (41)              | 0.13               |
| Displaced                | 21 (22)           | 124 (37)           | 14 (21)          | 0.003              | 67 (38)                                | 24 (24)               | 36 (29)              | 0.05               |
| Agenesis                 | 12 (13)           | 117 (35)           | 0                | 2E-13 <sup>a</sup> | 63 (35)                                | 18 (18)               | 38 (30)              | 0.008              |
| Supernumerary            | 1 (1)             | 6 (2)              | 0                | 0.85               | 1 (<1)                                 | 1 (1)                 | 3 (2)                | 0.45               |
| Any anomaly              | 65 (68)           | 228 (68)           | 31 (47)          | 0.005              | 133 (53)                               | 57 (57)               | 77 (48)              | 0.004              |
| Any anomaly <sup>b</sup> | 26 (27)           | 161 (48)           | 4 (6)            | 2E-12 <sup>a</sup> | 89 (50)                                | 25 (25)               | 56 (45)              | 2E-04              |
| <b>Maxilla</b>           |                   |                    |                  |                    |                                        |                       |                      |                    |
| Hypoplasia               | 8 (8)             | 54 (16)            | 1 (1)            | 7E-04              | 25 (4)                                 | 12 (12)               | 23 (18)              | 0.38               |
| Microdontia              | 12 (13)           | 35 (10)            | 2 (3)            | 0.08               | 18 (10)                                | 10 (10)               | 13 (10)              | 1.00               |
| Impacted                 | 1 (1)             | 26 (8)             | 2 (3)            | 0.02               | 10 (6)                                 | 6 (6)                 | 5 (4)                | 0.78               |
| Rotated                  | 65 (68)           | 183 (54)           | 32 (48)          | 0.02               | 104 (58)                               | 56 (56)               | 64 (40)              | 0.46               |
| Displaced                | 31 (32)           | 152 (45)           | 23 (35)          | 0.04               | 75 (43)                                | 42 (42)               | 45 (36)              | 0.48               |
| Agenesis                 | 20 (21)           | 160 (48)           | 0                | 6E-19 <sup>a</sup> | 73 (41)                                | 41 (41)               | 53 (42)              | 0.97               |
| Supernumerary            | 6 (6)             | 10 (3)             | 0                | 0.08               | 9 (5)                                  | 1 (1)                 | 3 (2)                | 0.18               |
| Any anomaly              | 73 (77)           | 258 (77)           | 35 (53)          | 5E-04              | 143 (80)                               | 73 (73)               | 89 (71)              | 0.15               |
| Any anomaly <sup>b</sup> | 37 (40)           | 209 (62)           | 5 (8)            | 7E-18 <sup>a</sup> | 102 (57)                               | 56 (56)               | 70 (56)              | 0.97               |
| <b>Mandible</b>          |                   |                    |                  |                    |                                        |                       |                      |                    |
| Hypoplasia               | 5 (5)             | 6 (2)              | 1 (2)            | 0.16               | 5 (3)                                  | 3 (3)                 | 2 (1)                | 0.78               |
| Microdontia              | 0                 | 1 (<1)             | 0                | 1.00               | 0                                      | 1 (1)                 | 0                    | 0.25               |
| Impacted                 | 0                 | 4 (1)              | 2 (3)            | 0.20               | 1 (<1)                                 | 1 (1)                 | 1 (<1)               | 11.00              |
| Rotated                  | 68 (72)           | 198 (59)           | 39 (59)          | 0.07               | 115 (55)                               | 60 (60)               | 68 (54)              | 0.21               |
| Displaced                | 25 (26)           | 54 (16)            | 11 (17)          | 0.08               | 29 (16)                                | 24 (24)               | 14 (11)              | 0.04               |
| Agenesis                 | 5 (5)             | 13 (4)             | 1 (2)            | 0.48               | 8 (4)                                  | 3 (3)                 | 7 (6)                | 0.68               |
| Supernumerary            | 0                 | 2 (<1)             | 0                | 1.00               | 1 (<1)                                 | 0                     | 1 (<1)               | 1.00               |
| Any anomaly              | 73 (77)           | 210 (63)           | 41 (62)          | 0.03               | 121 (68)                               | 67 (65)               | 72 (58)              | 0.15               |
| Any anomaly <sup>b</sup> | 10 (11)           | 24 (7)             | 4 (6)            | 0.48               | 15 (8)                                 | 8 (8)                 | 9 (7)                | 0.97               |

CL, cleft lip; CLP, cleft lip and palate; CP, cleft palate.

<sup>a</sup>Indicates significance ( $P < 1.5E-04$ ).<sup>b</sup>Any anomaly without malposition (displacement and rotation).

### OFC Dental Phenotype Part 2 Intra-Oral Photos



4106

Recorded by

Initials

Study ID

Letters    Numbers

Date

mm    dd    yyyy

Individual ID

Number    Number

**Overall Photo Quality**

Poor

Good

**1. Dental Examination, Maxillary Teeth**

*Rate each tooth by marking the bubbles below. Each tooth should have an entry. Fill-in the bubble for primary or permanent tooth. Teeth can either be missing or present. If there is space or a supernumerary tooth, mark the box between the two adjacent teeth.*

|                            | Quadrant 1                                          |  | 18                    | 1                     | 17                    | 2                     | 16                    | 3                     | 15                                                                             | 4                     | 14                                                                             | 5                     | 13                                                                             | 6                     | 12                                                                             | 7                     | 11                                                                             | 8                     |
|----------------------------|-----------------------------------------------------|--|-----------------------|-----------------------|-----------------------|-----------------------|-----------------------|-----------------------|--------------------------------------------------------------------------------|-----------------------|--------------------------------------------------------------------------------|-----------------------|--------------------------------------------------------------------------------|-----------------------|--------------------------------------------------------------------------------|-----------------------|--------------------------------------------------------------------------------|-----------------------|
|                            |                                                     |  |                       |                       |                       |                       |                       |                       | <input type="radio"/> 4<br><input type="radio"/> 55<br><input type="radio"/> A |                       | <input type="radio"/> 5<br><input type="radio"/> 54<br><input type="radio"/> B |                       | <input type="radio"/> 6<br><input type="radio"/> 53<br><input type="radio"/> C |                       | <input type="radio"/> 7<br><input type="radio"/> 52<br><input type="radio"/> D |                       | <input type="radio"/> 8<br><input type="radio"/> 51<br><input type="radio"/> E |                       |
| <b>Missing:</b>            | Agenesis                                            |  | <input type="radio"/>                                                          | <input type="radio"/> | <input type="radio"/>                                                          | <input type="radio"/> | <input type="radio"/>                                                          | <input type="radio"/> | <input type="radio"/>                                                          | <input type="radio"/> | <input type="radio"/>                                                          | <input type="radio"/> |
|                            | Other                                               |  | <input type="radio"/>                                                          | <input type="radio"/> | <input type="radio"/>                                                          | <input type="radio"/> | <input type="radio"/>                                                          | <input type="radio"/> | <input type="radio"/>                                                          | <input type="radio"/> | <input type="radio"/>                                                          | <input type="radio"/> |
| <b>Present</b>             |                                                     |  | <input type="radio"/>                                                          | <input type="radio"/> | <input type="radio"/>                                                          | <input type="radio"/> | <input type="radio"/>                                                          | <input type="radio"/> | <input type="radio"/>                                                          | <input type="radio"/> | <input type="radio"/>                                                          | <input type="radio"/> |
| <b>Present Status:</b>     |                                                     |  | <input type="radio"/>                                                          | <input type="radio"/> | <input type="radio"/>                                                          | <input type="radio"/> | <input type="radio"/>                                                          | <input type="radio"/> | <input type="radio"/>                                                          | <input type="radio"/> | <input type="radio"/>                                                          | <input type="radio"/> |
|                            | Full coverage (crown)                               |  | <input type="radio"/>                                                          | <input type="radio"/> | <input type="radio"/>                                                          | <input type="radio"/> | <input type="radio"/>                                                          | <input type="radio"/> | <input type="radio"/>                                                          | <input type="radio"/> | <input type="radio"/>                                                          | <input type="radio"/> |
|                            | Partial coverage (onlay, cusp replacement, veneers) |  | <input type="radio"/>                                                          | <input type="radio"/> | <input type="radio"/>                                                          | <input type="radio"/> | <input type="radio"/>                                                          | <input type="radio"/> | <input type="radio"/>                                                          | <input type="radio"/> | <input type="radio"/>                                                          | <input type="radio"/> |
|                            | Filling (amalgam, composite)                        |  | <input type="radio"/>                                                          | <input type="radio"/> | <input type="radio"/>                                                          | <input type="radio"/> | <input type="radio"/>                                                          | <input type="radio"/> | <input type="radio"/>                                                          | <input type="radio"/> | <input type="radio"/>                                                          | <input type="radio"/> |
|                            | Gross decay                                         |  | <input type="radio"/>                                                          | <input type="radio"/> | <input type="radio"/>                                                          | <input type="radio"/> | <input type="radio"/>                                                          | <input type="radio"/> | <input type="radio"/>                                                          | <input type="radio"/> | <input type="radio"/>                                                          | <input type="radio"/> |
|                            | Attrition more than 2/3 of the clinical crown       |  | <input type="radio"/>                                                          | <input type="radio"/> | <input type="radio"/>                                                          | <input type="radio"/> | <input type="radio"/>                                                          | <input type="radio"/> | <input type="radio"/>                                                          | <input type="radio"/> | <input type="radio"/>                                                          | <input type="radio"/> |
| <b>If present:</b>         |                                                     |  | <input type="radio"/>                                                          | <input type="radio"/> | <input type="radio"/>                                                          | <input type="radio"/> | <input type="radio"/>                                                          | <input type="radio"/> | <input type="radio"/>                                                          | <input type="radio"/> | <input type="radio"/>                                                          | <input type="radio"/> |
|                            | Fluorosis                                           |  | <input type="radio"/>                                                          | <input type="radio"/> | <input type="radio"/>                                                          | <input type="radio"/> | <input type="radio"/>                                                          | <input type="radio"/> | <input type="radio"/>                                                          | <input type="radio"/> | <input type="radio"/>                                                          | <input type="radio"/> |
|                            | Hypoplasia                                          |  | <input type="radio"/>                                                          | <input type="radio"/> | <input type="radio"/>                                                          | <input type="radio"/> | <input type="radio"/>                                                          | <input type="radio"/> | <input type="radio"/>                                                          | <input type="radio"/> | <input type="radio"/>                                                          | <input type="radio"/> |
|                            | Hypocalcification                                   |  | <input type="radio"/>                                                          | <input type="radio"/> | <input type="radio"/>                                                          | <input type="radio"/> | <input type="radio"/>                                                          | <input type="radio"/> | <input type="radio"/>                                                          | <input type="radio"/> | <input type="radio"/>                                                          | <input type="radio"/> |
|                            | Microdontia                                         |  | <input type="radio"/>                                                          | <input type="radio"/> | <input type="radio"/>                                                          | <input type="radio"/> | <input type="radio"/>                                                          | <input type="radio"/> | <input type="radio"/>                                                          | <input type="radio"/> | <input type="radio"/>                                                          | <input type="radio"/> |
|                            | Impacted                                            |  | <input type="radio"/>                                                          | <input type="radio"/> | <input type="radio"/>                                                          | <input type="radio"/> | <input type="radio"/>                                                          | <input type="radio"/> | <input type="radio"/>                                                          | <input type="radio"/> | <input type="radio"/>                                                          | <input type="radio"/> |
|                            | Rotation                                            |  | <input type="radio"/>                                                          | <input type="radio"/> | <input type="radio"/>                                                          | <input type="radio"/> | <input type="radio"/>                                                          | <input type="radio"/> | <input type="radio"/>                                                          | <input type="radio"/> | <input type="radio"/>                                                          | <input type="radio"/> |
|                            | Displaced                                           |  | <input type="radio"/>                                                          | <input type="radio"/> | <input type="radio"/>                                                          | <input type="radio"/> | <input type="radio"/>                                                          | <input type="radio"/> | <input type="radio"/>                                                          | <input type="radio"/> | <input type="radio"/>                                                          | <input type="radio"/> |
|                            | Mammalons                                           |  | <input type="radio"/>                                                          | <input type="radio"/> | <input type="radio"/>                                                          | <input type="radio"/> | <input type="radio"/>                                                          | <input type="radio"/> | <input type="radio"/>                                                          | <input type="radio"/> | <input type="radio"/>                                                          | <input type="radio"/> |
|                            | Incisal Fissures                                    |  | <input type="radio"/>                                                          | <input type="radio"/> | <input type="radio"/>                                                          | <input type="radio"/> | <input type="radio"/>                                                          | <input type="radio"/> | <input type="radio"/>                                                          | <input type="radio"/> | <input type="radio"/>                                                          | <input type="radio"/> |
|                            | Other (specify below)                               |  | <input type="radio"/>                                                          | <input type="radio"/> | <input type="radio"/>                                                          | <input type="radio"/> | <input type="radio"/>                                                          | <input type="radio"/> | <input type="radio"/>                                                          | <input type="radio"/> | <input type="radio"/>                                                          | <input type="radio"/> |
| <b>Confidence:</b>         | Low                                                 |  | <input type="radio"/>                                                          | <input type="radio"/> | <input type="radio"/>                                                          | <input type="radio"/> | <input type="radio"/>                                                          | <input type="radio"/> | <input type="radio"/>                                                          | <input type="radio"/> | <input type="radio"/>                                                          | <input type="radio"/> |
|                            | High                                                |  | <input type="radio"/>                                                          | <input type="radio"/> | <input type="radio"/>                                                          | <input type="radio"/> | <input type="radio"/>                                                          | <input type="radio"/> | <input type="radio"/>                                                          | <input type="radio"/> | <input type="radio"/>                                                          | <input type="radio"/> |
| <b>Extra Teeth</b>         |                                                     |  | <input type="radio"/>                                                          | <input type="radio"/> | <input type="radio"/>                                                          | <input type="radio"/> | <input type="radio"/>                                                          | <input type="radio"/> | <input type="radio"/>                                                          | <input type="radio"/> | <input type="radio"/>                                                          | <input type="radio"/> |
| <b>Space Between Teeth</b> |                                                     |  | <input type="radio"/>                                                          | <input type="radio"/> | <input type="radio"/>                                                          | <input type="radio"/> | <input type="radio"/>                                                          | <input type="radio"/> | <input type="radio"/>                                                          | <input type="radio"/> | <input type="radio"/>                                                          | <input type="radio"/> |

**Quadrant 1 Notes**

06/29/2012

University of Pittsburgh Version 2

Page 1 of 4

Appendix Figure I. Intraoral photograph evaluation form.

## OFC Dental Phenotype Form Part 2 Dental Professionals

  
 20278  
 Recorded by  
    
 Dentist Initials

Letters  
 Study ID  -

Number  
 Individual ID         -

Number  
 Date   /   /

**1. Dental Examination, Maxillary Teeth**  Part 2 Not Completed/Refused

*Rate each tooth by marking the bubbles below. Fill-in the bubble for primary or permanent tooth. Teeth can either be missing, sound, decayed, or restored. If there is a supernumerary tooth, mark the box between the two adjacent teeth.*

| Quadrant 1              | 18                    | 1                     | 17                    | 2                     | 16                    | 3                     | 15                    | 4                     | 14                    | 5                     | 13                    | 6                     | 12                    | 7                     | 11                    | 8                     |
|-------------------------|-----------------------|-----------------------|-----------------------|-----------------------|-----------------------|-----------------------|-----------------------|-----------------------|-----------------------|-----------------------|-----------------------|-----------------------|-----------------------|-----------------------|-----------------------|-----------------------|
|                         |                       |                       |                       |                       |                       |                       | 55                    | A                     | 54                    | B                     | 53                    | C                     | 52                    | D                     | 51                    | E                     |
| <b>Missing:</b> Decay   | <input type="radio"/> |
| Agenesis                | <input type="radio"/> |
| Other                   | <input type="radio"/> |
| X-ray Needed            | <input type="radio"/> |
| <b>Sound</b>            | <input type="radio"/> |
| <b>Decayed</b>          | <input type="radio"/> |
| <b>Restored</b>         | <input type="radio"/> |
| <b>Other:</b> Fluorosis | <input type="radio"/> |
| Hypoplasia              | <input type="radio"/> |
| Microdontia             | <input type="radio"/> |
| Impacted                | <input type="radio"/> |
| Rotation                | <input type="radio"/> |
| Displaced               | <input type="radio"/> |
| Other (specify)         | <input type="radio"/> |

**Extra Teeth**

Quadrant 1 Notes

| Quadrant 2              | 21                    | 9                     | 22                    | 10                    | 23                    | 11                    | 24                    | 12                    | 25                    | 13                    | 26                    | 14                    | 27                    | 15                    | 28                    | 16                    |
|-------------------------|-----------------------|-----------------------|-----------------------|-----------------------|-----------------------|-----------------------|-----------------------|-----------------------|-----------------------|-----------------------|-----------------------|-----------------------|-----------------------|-----------------------|-----------------------|-----------------------|
|                         | 61                    | F                     | 62                    | G                     | 63                    | H                     | 64                    | I                     | 65                    | J                     |                       |                       |                       |                       |                       |                       |
| <b>Missing:</b> Decay   | <input type="radio"/> |
| Agenesis                | <input type="radio"/> |
| Other                   | <input type="radio"/> |
| X-ray Needed            | <input type="radio"/> |
| <b>Sound</b>            | <input type="radio"/> |
| <b>Decayed</b>          | <input type="radio"/> |
| <b>Restored</b>         | <input type="radio"/> |
| <b>Other:</b> Fluorosis | <input type="radio"/> |
| Hypoplasia              | <input type="radio"/> |
| Microdontia             | <input type="radio"/> |
| Impacted                | <input type="radio"/> |
| Rotation                | <input type="radio"/> |
| Displaced               | <input type="radio"/> |
| Other (specify)         | <input type="radio"/> |

**Extra Teeth**

Quadrant 2 Notes

06/17/2009

University of Pittsburgh Version 2

Page 1 of 2

Appendix Figure 2. In-person dental exam form.
